# Supplementary material
Source: PubMed Central journal article supplement (PMC6547134)
Supplement: jamaoncol-5-999-s002.pdf [file jamaoncol-5-999-s002.pdf]

## Supplementary Online Content

Johnson ML, Braitheh F, Grilley-Olson JE, et al. Assessment of subcutaneous vs intravenous administration of anti-PD-1 antibody PF-06801591 in patients with advanced solid tumors: a phase 1 dose-escalation trial. Published online May 30, 2019. *JAMA Oncol*. doi:10.1001/jamaoncol.2019.0836

**eFigure 1.** Kaplan-Meier Estimate of Progression-Free Survival Based on Investigator Assessment by IV Combined versus Subcutaneous (RECIST), mITT

**eTable 1.** Treatment-Emergent Adverse Events—All Cycles, by PF-06801591 Arm

**eTable 2.** Summary of Tumor Assessments, mITT Analysis

**eTable 3.** PK Parameters of PF-06801591 After IV or SC Administration

This supplementary material has been provided by the authors to give readers additional information about their work.

**eFigure 1. Kaplan-Meier Plot of Progression-Free Survival Based on Investigator Assessment by IV Combined versus Subcutaneous (RECIST), mITT**

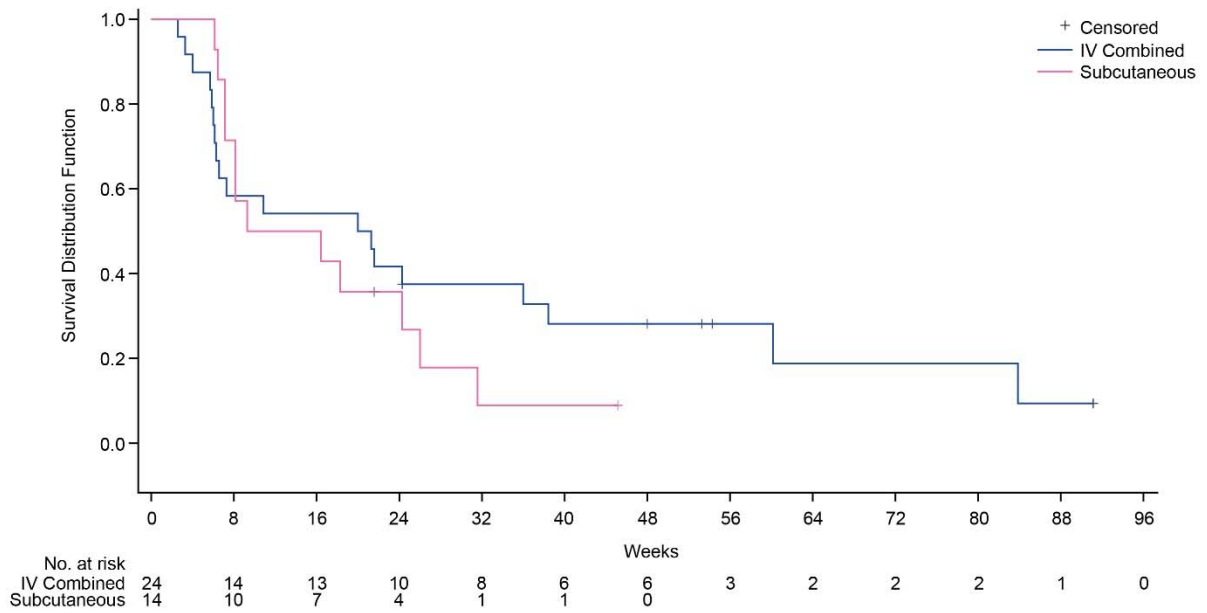

IV, intravenous; mITT, modified intent-to-treat population; RECIST, Response Evaluation Criteria in Solid Tumors

**eTable 1. Treatment-Emergent Adverse Events – All Cycles, by PF-06801591 Arm**

| AEs, n (%)                            | All IV Doses<br>n=25 | 300 mg SC<br>n=15 | Total<br>N=40 |
|---------------------------------------|----------------------|-------------------|---------------|
| <b>All-causality AEs (≥20%)</b>       |                      |                   |               |
| Any AE                                | 24 (96)              | 15 (100)          | 39 (98)       |
| Grade 3-4                             | 6 (24)               | 4 (27)            | 9 (23)        |
| Grade 5 <sup>a</sup>                  | 5 (20)               | 3 (20)            | 8 (20)        |
| Fatigue                               | 12 (48)              | 5 (33)            | 17 (43)       |
| Decreased appetite                    | 6 (24)               | 7 (47)            | 13 (33)       |
| Vomiting                              | 7 (28)               | 6 (40)            | 13 (33)       |
| Constipation                          | 10 (40)              | 2 (13)            | 12 (30)       |
| Diarrhea                              | 8 (32)               | 4 (27)            | 12 (30)       |
| Nausea                                | 5 (20)               | 6 (40)            | 11 (28)       |
| Dyspnea                               | 6 (24)               | 5 (33)            | 11 (28)       |
| Anemia                                | 7 (28)               | 3 (20)            | 10 (25)       |
| Cough                                 | 5 (20)               | 4 (27)            | 9 (23)        |
| Back pain                             | 4 (16)               | 4 (27)            | 8 (20)        |
| <b>Treatment-related AEs (≥10%)</b>   |                      |                   |               |
| Any AE                                | 19 (76)              | 13 (87)           | 32 (80)       |
| Grade 3 <sup>b</sup>                  | 3 (12)               | 1 (7)             | 4 (10)        |
| Fatigue                               | 5 (20)               | 4 (27)            | 9 (23)        |
| Diarrhea                              | 3 (12)               | 4 (27)            | 7 (18)        |
| Decreased appetite                    | 2 (8)                | 4 (27)            | 6 (15)        |
| Nausea                                | 3 (12)               | 2 (13)            | 5 (13)        |
| Arthralgia                            | 2 (8)                | 2 (13)            | 4 (10)        |
| Dyspnea                               | 1 (4)                | 3 (20)            | 4 (10)        |
| Mucosal inflammation                  | 3 (12)               | 1 (7)             | 4 (10)        |
| Pruritus                              | 4 (16)               | 0                 | 4 (10)        |
| Vomiting                              | 2 (8)                | 2 (13)            | 4 (10)        |
| <b>Immune-related AEs<sup>c</sup></b> |                      |                   |               |
| Any AE                                | 10 (40)              | 3 (20)            | 13 (33)       |
| Pruritus                              | 3 (12)               | 0                 | 3 (8)         |
| Blood TSH increased                   | 1 (4)                | 1 (7)             | 2 (5)         |
| Hypothyroidism                        | 2 (8)                | 0                 | 2 (5)         |
| Hyperthyroidism                       | 1 (4)                | 1 (7)             | 2 (5)         |
| Pneumonitis                           | 1 (4)                | 1 (7)             | 2 (5)         |
| Hyperglycemia                         | 1 (4)                | 0                 | 1 (3)         |
| Pruritus generalized                  | 1 (4)                | 0                 | 1 (3)         |
| Dermatitis bullous                    | 1 (4)                | 0                 | 1 (3)         |
| Pancreatic failure                    | 1 (4)                | 0                 | 1 (3)         |
| Peripheral sensory neuropathy         | 1 (4)                | 0                 | 1 (3)         |
| ALT increased                         | 1 (4)                | 0                 | 1 (3)         |
| AST increased                         | 1 (4)                | 0                 | 1 (3)         |
| Amylase increased                     | 1 (4)                | 0                 | 1 (3)         |
| Arthralgia                            | 1 (4)                | 0                 | 1 (3)         |
| Enterocolitis                         | 1 (4)                | 0                 | 1 (3)         |
| Diarrhea                              | 1 (4)                | 0                 | 1 (3)         |
| <b>Discontinuations due to AE</b>     |                      |                   |               |
| All-causality                         | 7 (28)               | 1 (7)             | 8 (20)        |
| Treatment-related                     | 2 (8)                | 1 (7)             | 3 (8)         |
| <b>Interruptions due to AE</b>        |                      |                   |               |
| All-causality                         | 10 (40)              | 3 (20)            | 13 (33)       |
| Treatment-related                     | 6 (24)               | 2 (13)            | 8 (20)        |

<sup>a</sup> There were 8 grade 5 AEs: disease/neoplasm progression (n=7) and small intestinal obstruction (n=1). <sup>b</sup> There were no grade 5 treatment-related AEs; treatment-related grade 4 AE (hyperglycemia) occurred in one patient treated with 10 mg/kg IV. <sup>c</sup> Represents complete listing of all immune-related observed AEs. There were no grade >3 immune-related AEs; one patient could have had more than one AE.

AE, adverse event; ALT, alanine aminotransferase; AST, aspartate transaminase; IV, intravenous; SC, subcutaneous; TSH, thyroid-stimulating hormone.

**eTable 2. Summary of Tumor Assessments, mITT<sup>a</sup> Analysis**

|                       | RECIST            |                    |                  | irRECIST         |
|-----------------------|-------------------|--------------------|------------------|------------------|
|                       | PD-L1 Low<br>n=20 | PD-L1 High<br>n=10 | Total<br>n=38    | Total<br>n=38    |
|                       | n (%)             | n (%)              | n (%) [95% CI]   | n (%) [95% CI]   |
| Disease control rate, | 11 (55)           | 6 (60)             | 21 (55) [38, 71] | 24 (63) [46, 78] |
| Complete response     | 0                 | 0                  | 0 [0, 9]         | 0 [0, 9]         |
| Partial response      | 1 (5)             | 4 (40)             | 7 (18) [8, 34]   | 7 (18) [8, 34]   |
| Stable disease        | 10 (50)           | 2 (20)             | 14 (37) [22, 54] | 17 (45) [29, 62] |
| Progressive disease   | 8 (40)            | 4 (40)             | 15 (40) [24, 57] | 12 (32) [18, 49] |
| Not evaluable         | 1 (5)             | 0                  | 2 (5) [1, 18]    | 2 (5) [1, 18]    |

<sup>a</sup> Included all enrolled patients who received  $\geq 1$  dose of PF-06801591, had measurable disease baseline assessment (within 28 days prior to study entry) and  $\geq 1$  post-baseline assessment or disease progression or death before the first tumor assessment.

<sup>b</sup> Total includes patients with low or high PD-L1 expression, and those with not determined PD-L1 expression. <sup>c</sup> Among the 7 partial responders, 6 partial responders had confirmed best overall response of PR; 1 patient achieved partial response but disease progressed in the next subsequent tumor scan by RECIST 1.1, and non-determined by irRECIST.

CI, confidence interval; mITT, modified intent-to-treat; irRECIST, immune-related Response Evaluation Criteria in Solid Tumors.

**eTable 3. PK Parameters of PF-06801591 After IV or SC Administration**

| Dose           | n  | C <sub>max</sub> , µg/mL,<br>mean (CV%) | T <sub>max</sub> , days,<br>median (range) | AUC <sub>τ</sub> , µg-day/mL,<br>mean (CV%) |
|----------------|----|-----------------------------------------|--------------------------------------------|---------------------------------------------|
| <b>Cycle 1</b> |    |                                         |                                            |                                             |
| 0.5 mg/kg IV   | 2  | 11.8, 12.0 <sup>a</sup>                 | 0.045, 0.071 <sup>a</sup>                  | 117, 124 <sup>a</sup>                       |
| 1 mg/kg IV     | 7  | 21.8 (24)                               | 0.083 (0.045-1.2)                          | 203 (36)                                    |
| 3 mg/kg IV     | 8  | 68.7 (26)                               | 0.049 (0.042-0.97)                         | 637 (22)                                    |
| 10 mg/kg IV    | 7  | 229 (35)                                | 0.050 (0.043-0.090)                        | 2106 (30)                                   |
| 300 mg SC      | 15 | 23.5 (48)                               | 8.1 (2.1-28)                               | 474 (48) <sup>b</sup>                       |
| <b>Cycle 4</b> |    |                                         |                                            |                                             |
| 0.5 mg/kg IV   | 2  | 10.5, 15.5 <sup>a</sup>                 | 0.043, 0.13 <sup>a</sup>                   | 193, 195 <sup>a</sup>                       |
| 1 mg/kg IV     | 3  | 26.5 (42)                               | 0.083 (0.045-7.0)                          | 293 (19)                                    |
| 3 mg/kg IV     | 3  | 114 (27)                                | 0.049 (0.047-0.050)                        | 1433 (36)                                   |
| 10 mg/kg IV    | 5  | 431 (43)                                | 0.049 (0.045-0.090)                        | 5354 (32)                                   |
| 300 mg SC      | 7  | 58.4 (27)                               | 6.9 (6.8-7.0)                              | 1355 (26) <sup>c</sup>                      |

<sup>a</sup> Individual values are presented if n ≤ 2. <sup>b</sup> Value reported for n = 13. <sup>c</sup> Value reported for n = 6.

AUC<sub>τ</sub>, area under the serum concentration–time curve from time zero to time τ, the dosing interval, where τ=21 days for IV and 28 days for SC; C<sub>max</sub>, maximum observed serum concentration; CV, coefficient of variation; IV, intravenous; PK, pharmacokinetic; SC, subcutaneous; T<sub>max</sub>, time to maximum observed serum concentration.
