# Supplementary material
Source: PubMed Central journal article supplement (PMC6547134)
Supplement: jamaoncol-5-999-s003.pdf [file jamaoncol-5-999-s003.pdf]

# Data Sharing Statement

Johnson. Assessment of Subcutaneous vs Intravenous Administration of Anti-PD-1 Antibody PF-06801591 in Patients With Advanced Solid Tumors. *JAMA Oncol*. Published May 30, 2019. 10.1001/jamaoncol.2019.0836

## Data

**Data available:** Yes

**Data types:** Deidentified participant data

**How to access data:** Upon request, and subject to certain criteria, conditions and exceptions (see <https://www.pfizer.com/science/clinical-trials/trial-data-and-results> for more information), Pfizer will provide access to individual de-identified participant data from Pfizer-sponsored global interventional clinical studies conducted for medicines, vaccines and medical devices (1) for indications that have been approved in the US and/or EU or (2) in programs that have been terminated (i.e., development for all indications has been discontinued). Pfizer will also consider requests for the protocol, data dictionary, and statistical analysis plan. Data may be requested from Pfizer trials 24 months after study completion. The de-identified participant data will be made available to researchers whose proposals meet the research criteria and other conditions, and for which an exception does not apply, via a secure portal. To gain access, data requestors must enter into a data access agreement with Pfizer.

**When available:** With publication

## Supporting Documents

**Document types:** None

## Additional Information

**Who can access the data:** The de-identified participant data will be made available to researchers whose proposals meet the research criteria and other conditions, and for which an exception does not apply, via a secure portal.

**Types of analyses:** The de-identified participant data will be made available to researchers whose proposals meet the research criteria and other conditions, and for which an exception does not apply, via a secure portal.

**Mechanisms of data availability:** To gain access, data requestors must enter into a data access agreement with Pfizer.
